# Supplementary material
Source: PubMed Central journal article supplement (PMC7613826)
Supplement: EMS156429-supplement-Supplementary_Material.pdf [file EMS156429-supplement-Supplementary_Material.pdf]

1176

## Supplementary Materials

1178 **This PDF file includes:**

1180           Supplementary Materials and Methods

              Figs. S1 to S7

1182           Tables S1 and S4

1184 **Other Supplementary Materials for this manuscript include the following:**

              Table S2 and S3

1186

1188

## MATERIALS AND METHODS

### 1190 **CLINICAL CHARACTERISTICS OF PROBANDS**

The CHH cohort included 341 probands (184 KS and 173 normosmic CHH [nCHH]). The  
1192 diagnosis of CHH was made on the basis of: i) absent or incomplete puberty by 17 years  
of age; ii) low/normal gonadotropin levels in a setting of low serum testosterone/estradiol  
1194 levels; and iii) otherwise normal anterior pituitary function and normal imaging of the  
hypothalamic-pituitary region(1). Olfaction was assessed by self-reporting and/or formal  
1196 testing(81). Other CHH-associated phenotypes were evaluated on medical history and  
physical examination and formally assessed by targeted screening (e.g. audiogram) when  
1198 possible. When available, family members were included for genetic studies. This study  
was approved by the ethics committee of the University of Lausanne. All participants  
1200 provided written informed consent prior to study participation.

### 1202 **Family A, Patient II-1**

#### ***NOS1* p.Ala231Thr (heterozygous)**

1204 This male Middle-Eastern proband was first brought to medical attention at age 14-15  
years with absent pubertal development, but was ineligible for state-funded healthcare in  
1206 his country of birth. He had not presented with cryptorchidism or micropenis at birth. He  
later moved to the United Kingdom and was re-presented to medical services at age 29  
1208 years. He remained a pubertal (testicular volume at 1-2 ml bilaterally). Congenital  
hypogonadotropic hypogonadism (CHH) was diagnosed in a setting of low serum  
1210 testosterone (0.5 nmol/l) and low gonadotropins (LH >0.5 U/l, FSH <0.5 U/l) with otherwise  
unremarkable pituitary function. Pituitary MRI was normal. The sense of smell was  
1212 conserved when exposed to basic odorants. Targeted history did not reveal additional  
phenotypes. His parents were non-consanguineous and their history was unremarkable  
1214 for pubertal development and sense of smell. The patient does not carry any pathogenic  
or likely pathogenic variants in known CHH genes. However, he harbors a heterozygous

1216 *NOS1* mutation. The origin of this mutation could not be explored, because both parents  
were unavailable for DNA collection (stateless Bedouins living in Kuwait).

1218

#### **Family B, Patient II-1**

##### **1220 *NOS1* p.Arg260Gln (heterozygous)**

This male white European anosmic proband was first evaluated for absent puberty at age  
1222 15.5 years. Testicular volume was estimated at 1.5 ml bilaterally. Physical examination  
was unremarkable except for the presence of a supernumerary tooth. Testosterone was  
1224 frankly low (0.2 nmol/l), accompanied by low gonadotropins (LH 0.1 U/l, FSH 0.6 U/l). A  
cranial MRI was performed and confirmed pituitary hypoplasia and absent olfactory bulbs.  
1226 Based on the above data, Kallmann syndrome was diagnosed and testosterone was  
subsequently started. The patient's mother had normal menarche at age 12 years and  
1228 was subjectively found to be normosmic on formal testing (UPSIT). The patient's father  
possibly had delayed puberty but this information could not be verified due to advanced  
1230 Alzheimer disease and subsequent death. The patient harbors a heterozygous *NOS1*  
mutation, inherited from his mother.

1232

#### **Family C, Patient II-1**

##### **1234 *NOS1* p.Thr1107Met (heterozygous)**

This male patient of mixed ethnic origin (Swiss and Libyan) presented with micropenis and  
1236 right cryptorchidism at birth. An orchidopexy was performed at 9 months of life, coupled  
with a testicular biopsy that was not suggestive of testicular dysgenesis. At age 12 years,  
1238 the patient had normal height accrual but did not show any signs of spontaneous puberty.  
In addition, he reported a decreased sense of smell. Laboratory assessment at that  
1240 moment showed undetectable serum testosterone associated with low LH and FSH (0.2  
and 1.5 U/l), which remained flat following a GnRH stimulation test. A pituitary MRI  
1242 confirmed the presence of a normal pituitary gland but revealed absent olfactory bulbs  
bilaterally. The left testicle was not palpable in the scrotum. A pelvic MRI visualized a 0.5

1244 cm testis located in the left inguinal canal, which was subsequently treated by orchidopexy.  
The patient was started on testosterone replacement at age 13. At age 15, he was  
1246 reassessed after withdrawal of testosterone replacement. Both testes remained  
hypotrophic (testicular volume of 0.5 ml with Prader orchidometer). Serum total  
1248 testosterone was frankly low (0.7 nmol/l) in the presence of undetectable serum LH and  
FSH without any disturbance in the remaining pituitary axes. A 2-week trial of pulsatile  
1250 GnRH treatment led to a satisfactory increase of serum gonadotropins (peak of LH and  
FSH at 7.1 and 6.3 U/l), thus confirming a hypothalamic deficit. Testosterone replacement  
1252 via intramuscular injection was then reinstated. Normal hearing function was attested by  
formal testing (audiogram). Family history was remarkable for delayed puberty in the  
1254 mother whose menarche was induced at age 15.5 years. She later recovered spontaneous  
menses and was considered to have constitutional delay of growth and puberty (CDGP).  
1256 The father had a normal pubertal onset. Both parents were found to have a normal sense  
of smell on formal testing (UPSIT). The patient does not harbor any pathogenic or likely  
1258 pathogenic variants in known CHH genes. A heterozygous NOS1 mutation was found in  
both the proband (CHH) and his mother (CDGP).

1260

#### **Family D, Patient II-1**

1262 **NOS1, p.Glu1124Lys (heterozygous)**

This female Middle-Eastern patient presented with complete absence of puberty,  
1264 manifesting as primary amenorrhea and absent breast development at age 17 years. The  
diagnosis remained unclear at that moment and the patient was put on estrogen-progestin  
1266 pills. She was later treated for infertility by ovarian stimulation (gonadotropins) in her  
country of residence (Kosovo), leading to a triplet pregnancy, but suffered a miscarriage.  
1268 At age 31 years, she consulted our clinic for a second opinion. After review of previous  
medical records and a new laboratory assessment confirming isolated hypogonadotropic  
1270 hypogonadism (estradiol 0.07 nmol/l, LH 0.1 U/l, FSH 0.5 U/l), CHH was suspected. The  
sense of smell was subjectively conserved but formal testing revealed hyposmia (Sniffin'



1272 Sticks, 10/16, corresponding to 5<sup>th</sup> percentile). The patient also reported scoliosis. Normal  
hearing function was attested by formal testing (audiogram). Cranial MRI showed reduced  
1274 size of the pituitary gland without midline defects. Kallmann syndrome was diagnosed and  
the patient was subsequently put on pulsatile GnRH replacement, which restored  
1276 ovulatory cycles and led to a twin pregnancy after 4 cycles. After thorough questioning,  
her father was found to have delayed puberty (late growth spurt, end of growth at age 19  
1278 years). Her mother is anosmic (UPSIT 14/40). The patient's four siblings (two brothers and  
two sisters) had normal pubertal timing. She gave birth to healthy dizygotic twins (one boy  
1280 and one girl) with normal genitalia at physical examination. The patient does not carry any  
variants in known CHH genes but harbors a *NOS1* mutation, inherited from her father  
1282 (CDGP).

1284 **Family E, Patient II-1**

***NOS1*, p.Glu1124Lys (heterozygous)**

1286 This male proband of Albanian descent was referred to our center for genetic testing by  
another Swiss University Hospital. He was diagnosed with CHH at age 19 after consulting  
1288 for complete absence of pubertal development (absence of male secondary sex  
characteristics, estimated testicular volume at 1.5 ml, micropenis). At diagnosis, hormonal  
1290 work-up showed low serum free testosterone at 3 pmol/l (reference range 20.2-99.4  
pmol/l), accompanied by undetectable serum LH and FSH (both < 1 U/l). Other causes of  
1292 hypogonadotropic hypogonadism including hyperprolactinemia were excluded. Pituitary  
MRI was normal. He was found to have a normal sense of smell on formal testing (UPSIT,  
1294 34/40). The patient did not exhibit any other clinically evident anomalies. Nevertheless, a  
screening audiogram revealed a mild but bilateral sensorineural hearing loss. The patient  
1296 was treated with testosterone until age 39 years, when he was switched to combined  
gonadotropin therapy in order to induce spermatogenesis. Following IVF, he had one  
1298 healthy daughter. Family history was unremarkable for pubertal timing and sense of smell  
in the patient's parents as well as in his two siblings. Genetic testing did not reveal any

1300 pathogenic or likely pathogenic variants in known CHH genes. The proband is, however,  
a carrier of a very rare *NOS1* mutation. Both parents were deceased at the time of referral  
1302 and thus could not provide a DNA sample for genetic testing.

1304 **Family F, Patient II-1**

***NOS1*, p.Ile1223Met (heterozygous)**

1306 This female patient of Portuguese origin presented at age 17 years with primary  
amenorrhea. Initial hormonal assessment showed low serum estradiol associated with low  
1308 gonadotropins (LH < 0.1 U/l, FSH 0.23 U/l). The testing of other pituitary axes was normal.  
Cranial MRI showed normal pituitary gland with intact olfactory bulbs and olfactory strips.  
1310 The patient has a slight intellectual deficiency. She has an apparent narrowing of the bony  
internal acoustic pores bilaterally with moderate hearing impairment of the left side. The  
1312 sense of smell was normal based on patient's subjective assessment. A formal olfactory  
assessment was not performed due to subsequent hospitalization of the patient for  
1314 psychiatric reasons and loss of contact with the local endocrinologist. Family history was  
negative for pubertal delay and decreased sense of smell. The patient does not harbor  
1316 variants in known CHH genes. We detected, however, the presence of a heterozygous  
*NOS1* variant, inherited from her mother.

1318

**HUMAN TISSUES**

1320 Human hypothalamic tissues were obtained at autopsies from the Forensic Medicine  
Department of the University of Debrecen, Hungary, with the permission of the Regional  
1322 Committee of Science and Research Ethics (DEOEC RKEB/IKEB: 3183-2010).  
Permission to use 9 gestational-week-old human Fetuses was obtained from the French  
1324 Agence de Biomédecine (PFS16-002).  
Processing of human tissues and immunochemistry protocols are detailed below.

1326 **GENETIC ANALYSES**

Genomic DNA was extracted from peripheral blood samples using the Puregene Blood Kit  
1328 (Qiagen), following the manufacturer's protocol. Exome capture was performed using the  
SureSelect All Exon capture v2 or v5 (Agilent Technologies, Santa Clara, CA USA) and  
1330 sequenced on the HiSeq2500 (Illumina, San Diego CA USA) at BGI (BGI, Shenzhen, PRC).  
Raw sequences (FASTQ files) were analyzed using an in-house pipeline that utilizes the  
1332 Burrows-Wheeler Alignment algorithm (BWA)(82) for mapping the reads to the human  
reference sequence (GRCh37), and the Genome Analysis Toolkit (GATK)(83) for the  
1334 detection of single nucleotide variants (SNVs) and insertion/deletions (Indels). The  
resulting variants were annotated using Annovar version 20191024(84) and dbNSFP  
1336 version 4.0(85) for minor allele frequency (MAF) and pathogenicity scores.

Based on the prevalence of CHH(1), we established the MAF threshold as 0.01% and  
1338 excluded all variants with a higher MAF in gnomAD. Candidate *NOS1* variants were then  
prioritized using the following criteria: (1) *in silico* prediction of deleteriousness (CADD(86,  
1340 88) > 15), and (2) variant position in sub-regions highly intolerant to variation (LIMBR(41)  
score percentile < 5). All variants were confirmed by Sanger sequencing of both strands  
1342 with duplicate PCR reactions. A gene burden analysis for the identified *NOS1* variants was  
performed using a two-tailed Fisher's exact test in CHH probands vs. controls (gnomAD  
1344 exome controls). Furthermore, mutations in known CHH genes(1, 42, 89) according to  
ACMG criteria were noted for each proband and family members harboring rare variants  
1346 in *NOS1*. More specifically, we evaluated coding exons and intronic splice regions ( $\leq 6$  bp  
from the exons) of the known CHH genes for pathogenic and likely pathogenic variants  
1348 according to ACMG guidelines (90). The included CHH genes are: *ANOS1*  
(NM\_000216.2), *SEMA3A* (NM\_006080), *FGF8* (NM\_033163.3), *FGF17* (NM\_003867.2),  
1350 *SOX10* (NM\_006941), *IL17RD* (NM\_017563.3), *AXL* (NM\_021913), *FGFR1*  
(NM\_023110.2), *HS6ST1* (NM\_004807.2), *PCSK1* (NM\_000439), *LEP* (NM\_000230),  
1352 *LEPR* (NM\_002303), *FEZF1* (NM\_001024613), *NSMF* (NM\_001130969.1), *PROKR2*  
(NM\_144773.2), *WDR11* (NM\_018117), *PROK2* (NM\_001126128.13), *GNRH1*

1354 (NM\_000825.3), *GNRHR* (NM\_000406.2), *KISS1* (NM\_002256.3), *KISS1R*  
(NM\_032551.4), *TAC3* (NM\_013251.3), and *TACR3* (NM\_001059.2).

1356 Position-specific evolutionary preservation tool (PANTHER-PSEP)(91) was used to  
determine whether the identified *NOS1* missense variants were at sites conserved among  
1358 species, including *pig*, *rabbit*, *rat*, *mouse* and *ferret* (GenBank accession numbers  
*F1RKF2*, *O19132*, *D3ZEW7*, *Q9Z0J4* and *M3XUN6* respectively) and to predict their  
1360 putative damaging effect.

### 1362 ***IN SILICO* ANALYSIS**

The ConSurf web server (<http://consurf.tau.ac.il>) was used for the identification of  
1364 evolutionary conservation of amino acid positions in human *NOS1* (92). The degree of  
amino acid evolutionary conservation reflects its natural tendency to be mutated. Aim of  
1366 the method was to investigate whether any of the identified mutations are important for  
structure and/or function based on the evolutionary pattern of *Nos1*. Homology sequence  
1368 search was conducted based on amino acid sequence from the human crystal structure  
of *Nos1* (PDB ID code: 5VUV). PSI-BLAST homolog search algorithm and UniProt  
1370 database were used for the generation of a Multiple Sequence Alignment (MSA) with  
ClustalW algorithm and homologs were selected automatically. Maximum of 50  
1372 sequences, closest to the reference sequence of *Nos1*, were used for the analysis out of  
the homolog search algorithm. Maximal and minimal % ID between sequences were set  
1374 at 95 and 35 respectively.

### 1376 **PRODUCTION OF *NOS1* CONSTRUCTS**

A cDNA containing the entire coding region of the human *NOS1* transcript isoform 1  
1378 (RefSeq. NM\_000620.4; GenBank assembly accession; GRCh37.p13 /  
GCF\_000001405.25), was inserted into a modified pcDNA3.1+ expression vector  
1380 containing a his-tag at the 5'end (GeneCust). Similarly, plasmid encoding *NOS1* mutants  
(Arg260Gln and Ile1223Met) were obtained using modified pcDNA3.1+ expression vector

1382 containing a myc-tag at the 5'end of the coding region (GeneCust). The plasmid encoding  
remaining *NOS1* mutants (p.Ala231Thr, p.Thr1107Met and p.Glu1124Lys) were  
1384 generated by site directed mutagenesis using QuickChange XLII Kit (Stratagene) and  
confirmed by Sanger sequencing. FlincG3 NO-detector plasmid (pTriEx4-H6-FGAm) has  
1386 been produced as described previously (87).

To express equimolar amounts of WT and mutated *NOS1* transcripts in transfected cells,  
1388 we engineered bicistronic expression vectors encoding His-tag *NOS1* and Myc-tag *NOS1*  
separated by a P2A self-cleaving peptide to achieve equimolar expression of wild type  
1390 and mutated *NOS1* at single cell level (93). Briefly, His-*NOS1* WT cassette was PCR  
amplified and fused via overlap PCR to a synthetic P2A DNA sequence. The resulting His-  
1392 *NOS1*wt-P2A cassette was cloned (EcoRI – NotI) into pcDNA3.1+ expression vector.  
Next, sequences encoding for Myc-tag *NOS1* mutants were PCR amplified adding NotI  
1394 and XbaI restriction sites. PCR products were finally cloned (NotI – XbaI) to His-*NOS1*wt-  
P2A expression vectors. PCR amplifications were performed using Phusion HF (Thermo  
1396 Scientific) or Herculase (Agilent Technologies) high-fidelity DNA polymerases using  
primers listed in Table S4. All vector sequences were validated by sanger sequencing.

1398

#### **COMPOUNDS USED FOR *IN VITRO* AND *IN VIVO* EXPERIMENTS**

1400 All of the compounds used were delivered to the HEK 293T cells through superfusion. To  
explore the ability of the transfected cell line respond to nitric oxide, cells were treated with  
1402 the NO donor (Z)-1-[N-(3-ammoniopropyl)-N-(n-propyl)amino] diazen-1-ium-1,2-diolate  
(PAPA/NO; 1µM, Enzo Life Sciences, Exeter, UK) for a duration of 90 sec. Endogenous  
1404 NO release was stimulated upon application of calcimycin (A23187; 50 nM diluted in  
DMSO, Abcam) for a duration of 1 min. The responses to NO could be inhibited by both  
1406 the NOS inhibitor (L-NAME; 30 µM, Calbiochem) and the NO receptor blocker 1H-  
[1,2,4]oxadiazolo[4,3,-a] quinoxalin -1-one (ODQ; 1 µM, Sigma, Dorset, UK). ODQ is  
1408 shown to selectively and potently inhibit guanylyl cyclase and thus it can block the  
accumulation of cGMP in response to NO donors (94).

1410 For *in vivo* application NO synthesis was blocked using the NOS blocker L-NAME (Merck,  
Ref. 483125; 50 mg/kg i.p. and 5 mM intranasally), diluted as previously described (95).  
1412 The activity of phosphodiesterase 5 (PDE5) was inhibited by the use of Sildenafil (SIGMA,  
Ref. PZ0003; 15 mg/kg, i.p.) diluted in DMSO. KINOX 450 ppm mole/mole inhaled nitric  
1414 oxide gas was generously supplied by the Lille University Hospital.

#### 1416 **CELL CULTURE OF NITRIC OXIDE DETECTOR CELLS**

The HEK 293T cell line expressing NO-activated GC and phosphodiesterase-5 (PDE5),  
1418 previously referred to as GChighPDE5low cells (96) and hereby referred to as NO detector  
cells, were provided by Professor Doris Koesling (Ruhr-Universität Bochum, Bochum).  
1420 HEK 293T were cultured under standard conditions in a DMEM-based medium containing  
5% fetal bovine serum and appropriate selection antibiotics; they were replated before  
1422 reaching 80% confluency and were passaged <35 times.

Transfection was performed on cells growing in a 12-well plate (on poly-D-lysine-coated  
1424 coverslips) for live cell imaging, or in a 6-well plate for Abcam kit and co-  
immunoprecipitation experiments, using Fugene6 (Roche Applied Science) according to  
1426 the manufacturer's protocol, in a transfection rate of 3:1 (Fugene6/DNA). For the live-cell  
imaging, Flincg3 plasmid was co-transfected, in a one step process, with the NOS1  
1428 plasmid used in each experiment.

#### 1430 **WESTERN BLOT PROTEIN EXPRESSION ASSAY**

HEK293 cells were transfected in 12-well plates ( $2.5 \times 10^5$  cells/well) with WT, mutant  
1432 NOS1 and bicistronic constructs (500ng/well) using Fugene6 (Roche Applied Science)  
according to the manufacturer's protocol, in a transfection rate of 3:1 (Fugene6/DNA).  
1434 After 48h, proteins were extracted and western blot performed loading 20ug per lane.  
NOS1 and actin were revealed using anti-myc tag HRP conjugated (1:5000; Bethyl Cat#  
1436 A190-105P, RRID:AB\_162712) or the anti-his tag (1:5000; Cell Signaling Technology

Cat# 2365, RRID:AB\_2115720), and the anti-Actin (1/5000; Cell Signaling Technology  
1438 Cat# 4970, RRID:AB\_2223172) respectively.

#### 1440 **LIVE IMAGING**

***FlnG3 fluorescence imaging:*** FlnG3 has a broad excitation spectrum with peaks at  
1442 491 and 410 nm and an emission maximum at 507 nm. Time series were recorded using  
an Axio Observer Z1, with a camera (Orca LT) and a 20X air objective (numerical aperture  
1444 0.8, Zeiss), under software control (Zen Imaging Software, Zeiss). Fluorescent HEK 293T  
cells were excited at a wavelength set at 495, with an emission set at 519. Exposure levels  
1446 were set at 300 ms and the intensity level at 8%. The chamber was superfused at 1.5  
ml/min and temperature set at 37°C with imaging solution containing: KCl 2 mM, KH<sub>2</sub>PO<sub>4</sub>  
1448 1.18 mM, glucose 5.5 mM, HEPES 10 mM, NaCl 140 mM, CaCl<sub>2</sub> 1.5 mM. The solution  
was adjusted to a pH of 7.4 and osmolality to 285-290 mOsmol/kg at a temperature of  
1450 37°C.

***FlnG3 fluorescence data analyses:*** Epifluorescent signals were captured by camera,  
1452 corrected for the background levels, and displayed as the change in intensity relative to  
baseline divided by the baseline intensity ( $\Delta F/F_0$ ). Peak amplitudes for each cell giving a  
1454 fluorescent signal were measured by taking the maximum  $\Delta F/F_0$ , subtracting the mean  
baseline and then subtracting the difference between the peak  $\Delta F/F_0$  of the baseline and  
1456 the mean baseline for that cell. These calculations were made with OriginPro software  
(RRID:SCR\_014212).

1458

#### **NOS ACTIVITY ASSAY**

1460 The enzymatic activity of the NOS1 protein was assessed in NO detector cells transfected  
with the wild-type or the mutated plasmids, or transfected with the bicistronic constructs  
1462 using a commercially available Abcam NOS activity assay kit (Cat. # ab211084) according  
to the manufacturer's instructions.

1464

## PROTEIN IMMUNOPRECIPITATION ASSAY

1466 NO detector cells expressing the wild-type NOS1 or each of the bicistronic constructs stated above  
were lysed in Tris buffer pH 8.0 (25mM Tris base, 300mM NaCl, 50mM Imidazole) with the addition  
1468 of the protease and phosphatase inhibitor cocktail (Sigma-Aldrich, Cat. # PPC1010). Histidine-  
tagged NOS1 was isolated using the Dynabeads His-tag isolation and pulldown kit (Invitrogen, Cat.  
1470 # 10103D). Briefly 2mg of Dynabeads were added into 35 $\mu$ g of cell lysate and the Dynabeads-  
lysate mix was then incubated in a roller at 4 °C for 10min. The beads were thoroughly washed four  
1472 times in the Tris buffer using a magnet and eventually any protein bound to the his-tag was eluted  
using Tris buffer pH 8.0 containing increased concentration of imidazole (25mM Tris base, 300mM  
1474 NaCl, 500mM Imidazole). Protein content was measured in the whole lysate (i.e. prior to elution),  
as well as in the eluted part, using a BCA kit, according to the manufacturer's instructions. For the  
1476 immunoblot of the whole lysate and the eluted proteins, loading buffer (E-Gel™, 1X, Thermo Fisher,  
Cat. # 10482055) was added to the 5mg of each protein sample. The mix was then boiled for 5 min  
1478 before electrophoresis at 120V for 100 mins in 5–12% tris-acetate precast SDS-polyacrylamide  
gels according to the protocol supplied with the NuPAGE system (Thermo Fisher). After size  
1480 fractionation, the proteins were transferred onto a PVDF membrane (0.2 $\mu$ m pore size, LC2002;  
Invitrogen, Carlsbad CA, USA) in the blot module of the NuPAGE system maintained at 1A for 75  
1482 min at room temperature (RT). Blots were blocked for 1h in tris-buffered saline with 0.05% Tween  
20 (TBST) and 5% non-fat milk at RT, incubated for 48h at 4°C with anti-his-tag mouse monoclonal  
1484 (1:1000; Thermo Fisher Scientific Cat# MA1-21315, RRID:AB\_557403), rabbit anti-NOS1 (1:1000;  
Thermo Fisher Scientific Cat# 61-7000, RRID:AB\_2313734) and rabbit anti-GAPDH (1:5000;  
1486 Sigma-Aldrich Cat# G9545, RRID:AB\_796208) in TBST 5% bovine serum albumin (Sigma-Aldrich,  
Cat# A7906), and washed four times with TBST before being exposed to horseradish peroxidase-  
1488 conjugated secondary antibodies [anti-mouse Ig-HRP 1:1000 (Agilent Cat# P0260,  
RRID:AB\_2636929) and anti-rabbit Ig-HRP 1:2000 (Agilent Cat# P0448, RRID:AB\_2617138)]  
1490 diluted in 5% non-fat milk TBST for 1h at RT. The immunoreactions were detected with enhanced  
chemiluminescence (NEL101; Perkin Elmer, Boston, MA).

1492

## ANIMALS



1494 All C57Bl/6J mice were housed under specific pathogen-free conditions in a temperature-  
controlled room (21-22°C) with a 12h light/dark cycle and ad libitum access to food and  
1496 water. Experiments were performed on male and female C57BL/6J mice (Charles River  
Laboratories), *Nos1*-deficient (*Nos1*<sup>-/-</sup>, B6.129S4-Nos1tm1Plh/J,  
1498 RRID:IMSR\_JAX:002986) mice(26) and *Gnrh::Gfp* mice (a generous gift of Dr. Daniel J.  
Spergel, Section of Endocrinology, Department of Medicine, University of Chicago,  
1500 IL)(97). *Nos1*<sup>-/-</sup>; *Gnrh::Gfp* mice were generated in our animal facility by crossing *Nos1*<sup>-/+</sup>  
mice with *Gnrh::Gfp* mice. Animal studies were approved by the Institutional Ethics  
1502 Committees for the Care and Use of Experimental Animals of the Universities of Lille,  
Bordeaux and Geneva; all experiments were performed in accordance with the guidelines  
1504 for animal use specified by the European Union Council Directive of September 22, 2010  
(2010/63/EU) and the Swiss Federal Act on Animal Protection Ordinance, and were  
1506 approved by the French Department of Research (APAFIS#2617-2015110517317420v5  
and #27300-2020092210299373v3) and the Swiss Animal Protection.

1508

#### **GONADECTOMY OF MICE**

1510 The gonadectomy of wild-type C57Bl/6J mice was performed either at P12 or at 13 weeks  
of age under general isoflurane anesthesia (induction 4% in air 2 L/min, then 1.5% in air  
1512 0.3 L/min) after local injection of lidocaine (30 microliters of a 0.5% solution, s.c.) and  
preemptive Meloxicam treatment (5 mg/kg). Infantile mice were killed at P23 and adults  
1514 two weeks thereafter.

#### **EXAMINATION OF PHYSIOLOGY**

Weaned female mice were checked daily for vaginal opening. After vaginal opening,  
1518 vaginal smears were collected daily and analyzed under the microscope to identify the  
puberty onset (i.e. first appearance of two consecutive days where vaginal smears  
1520 contained cornified cells) and eventually the specific day of the estrous cycle. Male mice  
were checked daily for balanopreputial separation, as an external sign of puberty onset.

1522

#### **IN UTERO INTRANASAL INJECTION OF L-NAME**

1524 Pregnant wild-type females were anesthetized with isoflurane, placed ventral side up and  
covered with a sterile surgical cloth. Abdominal hair was removed from a small surface  
1526 around the incision. Skin and connective tissue were carefully cut and a small incision in  
the abdominal wall allowed the exposure of the uterine horn. Each horn was carefully  
1528 pulled out of the abdomen and placed on top of it, while it was kept moist with fresh DPBS  
throughout the surgical process. Saline and the NOS inhibitor L-NAME (5mM) were  
1530 injected into contralateral horns of each pregnant female. The needle was positioned  
vertically over the nose of the E12.5 embryo, and introduced until it was estimated to reach  
1532 the nasal septum. Following administration of the substance, the needle was held steady  
for a few seconds before being gently withdrawn. The uterus was then returned to the  
1534 abdomen and rehydrated with a small amount of DPBS. The incisions were closed with  
surgical sutures and the female was singly housed until embryo harvesting (E14.5).

1536

#### **INTRAPERITONEAL INJECTION OF L-NAME IN INFANTILE MICE**

1538 P10 wild-type female mice received bi-daily injections of L-NAME (50 mg/kg, i.p.) or control  
saline, during infantile period, till the day of weaning (P21). L-NAME or the control were  
1540 administered at 8H00 and 18H00, i.e. one hour after lights on and one hour before lights  
off according to a previously described protocol <sup>23</sup>. In the end of the treatment with the  
1542 NOS inhibitor, mice were monitored for the assessment of pubertal onset and the study of  
estrous cyclicity (see "Examination of physiology" section above). When L-NAME treated  
1544 mice and their control littermates reached adulthood, blood samples were collected from  
the facial vein on diestrus I and proestrus for the measurement of LH hormone (described  
1546 below).

#### **1548 HORMONAL LEVEL MEASUREMENTS**

1550 Plasma LH was measured using a highly sensitive Enzyme-linked Immunosorbent Assay  
(ELISA) as described elsewhere (98). Serum FSH levels were measured using  
1552 radioimmunoassay as previously described (33). The accuracy of hormone  
measurements was confirmed by the assessment of rodent serum samples of known  
concentration (external controls). Serum 17 $\beta$ -estradiol concentration was determined by  
1554 ELISA (Demeditec Diagnostics, Cat# DE2693) as described previously (99). Inhibin B was  
measured using a commercial Enzyme-linked Immunosorbent Assay (ELISA)  
1556 multispecies kit (AnshLabs, Cat# AL-163), following the manufacturers' protocol. AMH was  
measured using the commercial rat and mouse AMH Enzyme-linked Immunosorbent  
1558 Assay (ELISA) kit (AnshLabs, Cat# AL-113) as described elsewhere (100).

#### 1560 **INHALED NO ADMINISTRATION**

Protocol was adapted from previous publications by others (101, 102). *Nos1*<sup>+/-</sup> mother with  
1562 her pups (*Nos1*<sup>+/+</sup>, *Nos1*<sup>+/-</sup> and *Nos1*<sup>-/-</sup>) was placed inside a cage ("inhaled NO chamber")  
constantly perfused with 20 ppm NO, a dose commonly administered to premature infants  
1564 at birth (103) that induces the production of cGMP (Figure S7). Treatment started when  
pups reached P10 (lights on) and ended at P23, when mice were weaned and removed  
1566 from the inhaled NO chamber.

#### 1568 **SILDENAFIL ADMINISTRATION**

P10 *Nos1*<sup>+/+</sup>, *Nos1*<sup>+/-</sup> and *Nos1*<sup>-/-</sup> mice received daily injections of the phosphodiesterase 5  
1570 inhibitor Sildenafil (15 mg/kg, i.p.) during infantile period, till the day of weaning (P23).  
Sildenafil was administered at 8H00, i.e. one hour after lights are on. At the end of the  
1572 treatment with the NOS inhibitor, mice were monitored for the assessment of vaginal  
opening, pubertal onset and balanopreputial separation (see "Examination of physiology"  
1574 section above).

#### 1576 **BEHAVIORAL TESTS (COGNITION, OLFACTION, HEARING)**

1578 For all behavioral tests, the animals were coded so the investigator was blind to the genotype/phenotype of each animal.

**Novel object recognition test:** Recognition memory was assessed using the novel object  
1580 recognition (NOR) test. During the habituation phase on day 1, each mouse was allowed  
to explore the open-field arena for 30 minutes. On day 2, two identical objects (A+A) were  
1582 placed within the open-field arena on opposite sides of the cage, equidistant from the cage  
walls. Each mouse was placed within the two objects and allowed to explore them for 15  
1584 minutes. Day 3 consisted of two phases, a familiarization and a test phase. During the  
familiarization phase (trial 1) that lasted 15 minutes, mice explored two other identical  
1586 objects (B+B). After this phase, the mouse was placed back in its home cage for 1 hour  
before starting the test phase. During the test phase, one object of trial 1 and a completely  
1588 new object (B+C) were placed within the open-field area and mice were allowed to explore  
them for 5 minutes (trial 2). The object recognition score was calculated as the time spent  
1590 exploring the new object (trial 2) over the total exploration time, and is used to represent  
recognition memory function. NOD was performed in the afternoon in 3- to 8-month-old  
1592 male and female mice; females were in diestrus during the test phase.

**Olfactory habituation/dishabituation test:** The habituation/dishabituation test was used  
1594 to assess the ability to differentiate between different odors. This olfactory test included a  
presentation of acetophenone (Sigma-Aldrich, Cat. # 00790) for habituation and octanol  
1596 (Sigma-Aldrich, Cat. # 05608) for dishabituation, or vice versa. Before the test, mice were  
allowed to explore the open-field area and an empty odor box for 30 minutes. After this  
1598 habituation period, mice were sequentially presented with one odor for four consecutive  
trials for a duration of 1 minute, and an inter-trial interval of 10 minutes was maintained to  
1600 ensure the replacement of the odor. After four consecutive trials, a second odor was  
presented during a 1-minute trial. Odors (20µl of 1:1000 dilution) were administered on a  
1602 filter paper and placed in a perforated plastic box, to avoid direct contact with the odor  
stimulus. Measures consisted in recording the total amount of time the mouse spent

1604 sniffing the object during the different trials. Habituation/dishabituation test was performed  
in the morning in 3- to 8-month-old male and diestrous female mice.

1606 **Social olfactory preference test:** Social olfactory preference test consisted of two  
phases, a familiarization and a test phase. During the familiarization phase, all mice were  
1608 allowed to freely explore the open-field arena and were exposed to urine samples from an  
adult C57BL6/J wild-type stud male and estrous female for 30 min. After 30 min in clean  
1610 bedding, mice were allowed to explore the same urine samples for 10 min, during which  
the behavior towards the urine samples was recorded. For each test, 50  $\mu$ l of either male  
1612 or female urine was administered on a filter paper and placed in a perforated plastic box,  
to avoid direct contact with the odor stimulus. The distribution of the time sniffing the urine  
1614 samples was used as an indication of the interest to gain further information from the scent  
source. Social olfactory preference test was performed in the morning in 3- to 8-month-old  
1616 male and female mice; females were in estrous during the test phase.

**Hearing tests:** Mice were anesthetized by intraperitoneal injection of a mixture of  
1618 ketamine and levomepromazine (100 mg/kg and 5 mg/kg respectively) and placed on a  
servo-controlled heating pad that maintained their core temperature at 37°C. Audiological  
1620 tests were performed in a sound-proof booth. Distortion-product otoacoustic emissions  
(DPOAES) probes cochlear mechanics and auditory brainstem-evoked response (ABR)  
1622 thresholds and suprathreshold waveforms, both of which are sensitive to detect auditory-  
pathway disorders. The predominant DPOAE at frequency  $2f_1-f_2$  was recorded in response  
1624 to two primary tones  $f_1$  and  $f_2$ , with  $f_2/f_1 = 1.20$ , at equal sound levels (Cub°Dis system,  
Mimosa Acoustics; ER10B microphone, Etymotic Res.). Frequency  $f_2$  was swept at 1/10<sup>th</sup>  
1626 octave steps from 4 to 20 kHz, and DPOAE level was plotted against frequency  $f_2$  at  
increasing primary tone levels, from 20 to 70 dB SPL in 10 dB steps, then to 75 dB SPL.  
1628 The ABRs elicited by calibrated tone bursts in the 5-40 kHz range (repetition rate 17/s)  
were derived by synchronously averaging electroencephalograms recorded between  
1630 subcutaneous stainless-steel electrodes at the vertex and ipsilateral mastoid, with the help  
of a standard digital averaging system (CED1401+). One hundred 10-ms long epochs

1632 were averaged, except within 10 dB of the ABR threshold (defined as the smallest tone-  
burst level giving rise to at least one repeatable wave above background noise level, 100  
1634 nV in an anesthetized mouse), for which 300 epochs were collected. Next, ABRs in  
response to 10-kHz tone bursts at increasing levels, stepwise from 15 to 105 dB were  
1636 collected and their waves were labelled from I to IV in chronological order, for the latency  
of wave II to be extracted at every stimulus level. Hearing tests were performed during the  
1638 whole day in 2- to 3-month-old male and diestrus female mice.

#### 1640 **ATTENTIONAL SET-SHIFTING TASK**

The attentional set shifting (ASST) apparatus and procedures were previously described  
1642 in detail (104). In brief, testing was performed in a homemade rectangular chamber made  
of Plexiglas and white PVC, 40 x 30 x 40 cm. A 15 x 30 cm area of the chamber was  
1644 separated in the middle by an opaque white PVC separation, on each side of which a  
texture and a digging bowl (made of ceramic 3 cm height x 8 cm diameter size) were  
1646 placed. In all ASST trials, two odorants presented as clean odorized bedding in two bowls  
and two textures presented below each bowl were randomly combined and  
1648 counterbalanced, and placed in two separate compartments of the testing chamber.  
Various spices and herbs bought in a grocery store were used as odorants and were  
1650 added to the digging medium (the volume of each odorant was mostly 0.5 % of the volume  
of the digging medium prepared at least 24 hours before use). Various textures were used  
1652 as a second sensory dimension. Each texture material was cut to obtain rectangles of  
similar sizes (about 18 x 14 cm) and uniform thickness. These textures were matched by  
1654 color to avoid visual bias during testing.

In each trial, only one cue, either an odor or a texture, is reinforced by a food reward  
1656 hidden in the bedding (TestDiet; 20 mg sucrose pellet – Chocolate 1811223). For each  
trial, mice were allowed a maximum of five minutes to give an answer. The mouse was  
1658 requested to meet the learning criterion, which is 80 % correct choice rate over 10

consecutive trials, and at least the six last trials had to be consecutively correct choices,  
1660 to pass each block within a maximum of 90 trials. The relevant dimensions were  
counterbalanced.

1662 The mouse was placed on a restricted diet from at least three weeks before the ASST.  
Around one gram of food was provided per mouse per day to maintain the mouse above  
1664 85 % of the initial free-feeding body weight. Before starting the ASST habituation, at least  
five days were used to stabilize their weight. The degree of hunger could be a potential  
1666 confounding factor that may affect the duration and number of trials. The body weight was  
thus measured every morning and evening. The quantity of daily restricted food was  
1668 strictly controlled until the day the mouse terminated all blocks of the ASST.

At least 5 days before the ASST, the mouse started habituating to the empty testing  
1670 chamber for 30 minutes on three consecutive days. On the fourth day, the mouse started  
to habituate to dig two bowls filled with bedding, and a reward (TestDiet; 20 mg sucrose  
1672 pellets) was added on each side of the separating wall to train the mouse to dig for a  
reward.

1674 The ASST was conducted on two consecutive days. On day one, the mouse performed  
the simple discrimination (SD), the compound discrimination (CD) and the reversal of CD  
1676 (CDR) blocks. On day two, the mouse performed the intradimensional set-shifting (IDS)  
and the extradimensional set-shifting (EDS) blocks.

1678 The odorant bedding-filled digging bowls were placed on each side of the separating wall.  
The bowls were placed on texture. The bowl on the side containing the relevant and correct  
1680 dimension (either odorant or texture) contained a 20 mg food pellet. After the mouse was  
placed on the waiting chamber, the trial with the recording started. The trial ended, and its  
1682 result recorded until the mouse finished having the reward sucrose pellet. If a correct  
choice was made, the mouse was allowed to consume the reward and then returned to  
1684 the waiting chamber of the testing chamber; in case of an incorrect choice, the mouse was  
directly returned to the waiting chamber. If no choice was made after five minutes, the trial  
1686 was considered incorrect, and the mouse had to return to the waiting chamber. For the

1688 first three trials, the mouse was permitted to dig in the unbiased bowl without  
consequence, although an error was recorded, so that if one bowl was investigated in  
error, the mouse could move to the second baited bowl and learn the cue contingency.  
1690 The location (left/right) of the digging bowls and combinations of two different textures and  
two different odors were pseudo-randomly changed between trials so that the mouse  
1692 would not associate an odor to a texture or the correct choice to the location of the  
chamber. During testing, the chamber was cleaned using 70 % ethanol, and textures were  
1694 cleaned after every trial. When the mouse reached a learning criterion, the next block, a  
new set of cues was presented, and a positive transfer of the learned rule was expected;  
1696 i.e., the mouse had to make a new reward cue association within the same relevant  
sensory dimension as in the previous block (the SD, CD, CDR or IDS block). After reaching  
1698 the learning criterion again, the next block, another set of cues was used, and a new  
reward-cue association was made by reinforcing a cue within the previously irrelevant  
1700 dimension (the EDS block), i.e., testing the negative transfer of a previously learned rule.  
A perseverative response which is indicated by a continued choice using the previously  
1702 learned rule, the perseverative error was computed by the total number of errors made by  
the mouse during first half of all trials divided by the half of the total number of trials made  
1704 by the mouse to meet the criterion.

## 1706 **iDISCO+ AND TISSUE TRANSPARENTISATION**

**Sample preparation:** P0 pups coming from *Nos1*<sup>+/-</sup> mothers were anesthetized and  
1708 perfused with a fixative solution made up of 4% paraformaldehyde in PBS. The heads  
were postfixed in the fixative overnight, then rinsed with PBS, and subsequently  
1710 decalcified in an acidic solution (10% formic acid in ddH<sub>2</sub>O) before removal of the frontal  
and parietal bones.

1712 **Whole-mount immunostaining and tissue-clearing:** An adapted iDISCO+ protocol was  
performed: samples underwent a gradual dehydration in ethanol, followed by overnight  
1714 delipidation in 66% dichloromethane (DCM) / 33% ethanol, two rinses in ethanol, and



overnight bleaching in 7% H<sub>2</sub>O<sub>2</sub> in ethanol. Finally, samples were rehydrated gradually in  
1716 ethanol and washed in KPBS. Next, the heads were blocked and permeabilized in blocking  
solution (KPBS + 0.2% Gelatin + 1% Triton X-100 + 0.05% NaN<sub>3</sub>) for 5 days, and  
1718 incubated with primary antibodies rat anti-GnRH (1:10000 #EH1044, produced by Erik  
Hrabovszky) and goat anti-TAG1 (1:500, R and D Systems Cat# AF4439,  
1720 RRID:AB\_2044647) in blocking solution for 10 days. After several KPBS rinses, the heads  
were incubated with secondary antibodies in blocking solution for 5 days, and rinsed again  
1722 several times in KPBS. Following immunostaining, the samples were gradually dehydrated  
in ethanol and left overnight in DCM 66% / 33% ethanol. The samples were finally rinsed  
1724 in 100% DCM for 1 hour, before clearing in dibenzyl ether until transparency was achieved.

**Light-sheet imaging and 3D-analysis:** Cleared samples were imaged in dibenzyl ether  
1726 on an Ultramicroscope 1 (LavisionBiotec) equipped with an Andor Neo camera and a  
1.1x/0.1NA MI PLAN objective (LavisionBiotec). Acquisitions were saved as a tiff  
1728 sequence, which was converted to the Imaris file format and further processed in Imaris  
9.6 (Bitplane RRID:SCR\_007370). The Spots tool was used for GnRH neurons counting.

1730

## **IMMUNOHISTOCHEMISTRY/IMMUNOFLUORESCENCE**

1732 **MOUSE**

**Tissue preparation:** Embryos were washed thoroughly in cold 0.1 m PBS, fixed in fixative  
1734 solution [4% paraformaldehyde (PFA), in 0.1 m PBS, pH 7.4] for 6–8 h at 4°C and  
cryoprotected in 20% sucrose overnight at 4°C. The following day, embryos were  
1736 embedded in OCT embedding medium (Tissue-Tek), frozen on dry ice, and stored at  
–80°C until sectioning. Tissues were cryosectioned (Leica cryostat) sagittally at 16 µm.

1738 Postnatal (P7 to P23) wild-type female mice were anesthetized with 50-100 mg/kg of  
Ketamine-HCl and perfused transcardially with 2-10 ml of saline, followed by 10-50 ml of  
1740 4% PFA, pH 7.4. Brains were collected, postfixed in the same fixative for 2h at 4°C,  
embedded in OCT embedding medium (Tissue-Tek), frozen on dry ice, and stored at

1742 -80°C until cryosectioning (Leica cryostat). Sections were collected coronally at 35µm  
(free-floating sections) and 16µm for iNO box post-weaning *Nos1<sup>+/-</sup>* mice.

1744 Wild-type adult intact and gonadectomized mice were injected i.p. with a mixture of  
1746 pentobarbital (300 mg/kg) and lidocaine (30 mg/kg) and perfused transcardially with 2-10  
ml saline followed by 200 ml of 2% PFA in PB, pH 7.4, containing 0.2% picric acid. Brains  
1748 were collected, cryoprotected overnight in a sucrose solution (20% in a 0.1M veronal buffer  
(VB), pH 7.4), embedded in Tissue-Teck, frozen in liquid nitrogen and stored at -80°C until  
1750 cutting onto a cryostat (Microm). Twelve-micrometer thick coronal sections were collected  
onto gelatinized slides and kept at -80°C until immunolabeling.

***Immunolabeling of NOS1 and P-NOS1/ cGMP neurons in mouse developing***

1752 ***hypothalamus:*** As described previously (16, 95), sections were washed 3 times for 15  
minutes each in PB 0.1M and then incubated in blocking solution (5% NDS, 0.3% Triton  
1754 X-100 in PB 0.1M) for 1 hour at room temperature. Sections were incubated for 72 hours  
at 4°C with rabbit anti-Ser1412 phospho-Nos1 (1:500; Thermo Fisher Scientific Cat# PA1-  
1756 032, RRID:AB\_325020) and sheep anti-NOS1 (1:3000; generous gift from Dr. P. C.  
Emson, The Babraham Institute, Cambridge, UK Cat# K205, RRID:AB\_2895154) or  
1758 sheep antiserum to formaldehyde-fixed cGMP (1:1000; H.W.M. Steinbusch, Maastricht  
University). Sections were rinsed in PB and then incubated 1h at room temperature with  
1760 biotinylated donkey anti-rabbit (1:500; Jackson ImmunoResearch Laboratories Cat# 711-  
065-152, RRID:AB\_2340593) followed by incubation 1h at room temperature with  
1762 streptavidin-Alexa 568 (1:500; Thermo Fisher Cat# S-11226) and Alexa 647 donkey anti-  
sheep (1:500; Thermo Fisher Cat# A-21448, RRID:AB\_2535865 ), diluted in PB 0.1M.  
1764 Sections were then rinsed and counterstained with Hoechst (0.0001% in PB 0.1M; 5 min),  
rinsed again and coverslipped under Mowiol.

1766 ***Immunolabeling of NOS1 and NK3R neurons in mouse hypothalamus:*** As described  
previously (16, 95), sections were washed in VB and incubated overnight at room  
1768 temperature in a cocktail of sheep anti-NOS1 (1:5000; generous gift from Dr. P. C. Emson,  
The Babraham Institute, Cambridge, UK Cat# K205, RRID:AB\_2895154) and rabbit anti-

1770 NK3R [1:5000; (Dr. Philippe Ciofi, INSERM, France Cat# IS-7/7, RRID:AB\_2868390)  
allows the selective visualization in the arcuate nucleus of kisspeptin neurons by labeling  
1772 their somatodendritic domain (21)) in VB containing 0.25% Triton X-100 (VB-TX) and 1%  
normal donkey serum. After washes in VB, sections were incubated for two hours at room  
1774 temperature in a cocktail of Alexa 488 donkey anti-sheep (1:1000) and TRITC donkey anti-  
rabbit (1:1000) (both from Jackson ImmunoResearch Laboratories) in VB-TX. Sections  
1776 were then rinsed and coverslipped under a 1:3 mixture of VB and glycerol, containing 0.1%  
para-phenylenediamine (Sigma-Aldrich).

1778

#### **ADULT HUMAN BRAINS**

1780 **Tissue preparation:** Human hypothalamic tissues from 4 male (aged 35, 36, 61 and 83  
ys) and 6 female (aged 33, 58, 60, 70, 88 and 90 ys) subjects were obtained at autopsies  
1782 (*post mortem* interval <24 h) from the Forensic Medicine Department of the University of  
Debrecen, with the permission of the Regional Committee of Science and Research Ethics  
1784 (DEOEC RKEB/IKEB: 3183-2010). The included subjects were not known to suffer from  
neurological or endocrine disorders prior to death. Dissection and immersion-fixation of  
1786 hypothalamic tissue blocks, section preparation of serial coronal sections covering also  
the infundibular region were carried out as previously described (105).

1788 **Peroxidase immunolabeling of NOS1 and P-NOS1 neurons in adult human  
hypothalamus:** Dissection and immersion-fixation of hypothalamic tissue blocks, section  
1790 preparation and immunohistochemical procedures were adapted from previous  
studies (106). NOS1 synthesizing neurons were detected with a sheep NOS1 antiserum  
1792 (1:15,000, gift from Dr. P. C. Emson, The Babraham Institute, Cambridge, UK Cat# K205,  
RRID:AB\_2895154) and p-NOS1 neurons with a rabbit anti-Ser1412 phospho-Nos1  
1794 antiserum (1:100; Thermo Fisher Scientific Cat# PA1-032, RRID:AB\_325020). A 48h  
incubation in these primary antibodies was followed by working dilutions of biotinylated  
1796 secondary antibodies (1:500; 1 h ; Jackson ImmunoResearch Laboratories) and then,  
ABC Elite reagent (1:1000; 1 h ; Vector, Burlingame, CA, USA). The signal was visualized

1798 with Nickel-diaminobenzidine (Ni-DAB). To study the relationship between NOS1 and  
GnRH neurons, the Ni-DAB signal was silver-gold-intensified (106), followed by the  
1800 detection of GnRH neurons with a guinea pig GnRH antiserum (1:50,000; 48h ; #1018  
produced by Erik Hrabovszky), biotin-SP–anti-guinea pig IgG (1:500; 1h ; Jackson  
1802 ImmunoResearch Laboratories), ABC Elite reagent (1:1000; 1 h; Vector Laboratory) and  
DAB chromogen.

1804 **Triple-immunofluorescent detection of kisspeptin, NOS1 and GnRH in adult human  
brains:** Biotin Immunofluorescence experiments were performed as reported previously  
1806 (105). For simultaneous triple-immunofluorescent labelling of NOS1, GnRH and  
kisspeptin, previously characterized primary antibodies were applied to the sections in a  
1808 cocktail consisting of rabbit kisspeptin (1:1000; Antibody Verify, Las Vegas, NV USA;  
AAS26420C) (107), sheep NOS1 antiserum (1:1000, gift from Dr. P. C. Emson, The  
1810 Babraham Institute, Cambridge, UK Cat# K205, RRID:AB\_2895154) and guinea pig  
GnRH (1:1000; #1018 produced by Erik Hrabovszky) (106) (4C; 24h). Then, the sections  
1812 were transferred into a cocktail of antirabbit- Cy3 (1:1000) +anti-sheep-FITC (1:250) +  
anti-guinea pig-Cy5 (1:500) secondary antibodies (Jackson ImmunoResearch  
1814 Laboratories) for 12 h at 4 °C. The triple-labeled specimens were mounted, coverslipped  
with Mowiol and analyzed with confocal microscopy (Zeiss LSM780 microscope). High  
1816 resolution images were captured using a 20×/0.8 NA objective, a 1–3× optical zoom and  
the Zen software (Carl Zeiss). Different fluorochromes were used and detected with the  
1818 following laser lines: 488 nm for FITC, 561 nm for Cy3, 633 nm for Cy5.

Emission filters were as follows: 493–556 nm for FITC, 570–624 nm for Cy3 and 638–759  
1820 nm for Cy5. To avoid the emission crosstalk between the fluorophores, the red channel  
(Cy3) was recorded separately from the green (FITC)/far-red (Cy5) channels ('smart setup'  
1822 function). To illustrate the results, confocal Z-stacks (Z-steps: 0.941-1.000 µm, pixel dwell  
time: 1.27-1.58 µs, resolution: 1024×1024 pixels, pinhole size: set at 1 Airy unit) were  
1824 used. The extent of colocalization between kisspeptin and NOS1 was estimated from four

1826 subjects (aged 58, 70, 88 and 90 ys) of the postmenopausal model known to exhibit the highest kisspeptin levels in the infundibular region (106).

#### 1828 **DIGITAL IMAGE ACQUISITION OF MOUSE SECTIONS**

1830 Immunofluorescent preparations were analyzed on the LSM 710 Zeiss confocal microscope. Excitation wavelengths of 493/562 nm, 568/643 and 640/740 were selected to image Alexa 488, Alexa 568 and Alexa 647 secondary antibodies. All images were  
1832 taken with the objective EC Plan-Neofluar M27 (thread type). For investigating GnRH neuronal migration in embryonic tissue, sagittal sections of the head were acquired with  
1834 the 20X objective, using a numerical aperture 0.50, and a zoom of 1.0. For the analysis of hypothalamic NOS1/p-NOS1 ratio during development, Z-stack images were acquired  
1836 with the 40X oil objective, using a numerical aperture of 0.50, and a zoom of 1.0. For the analysis of hippocampal NOS1/p-NOS1 ratio after ovariectomy, Z-stack images with tiles  
1838 were acquired with the 20X objective, using a numerical aperture of 0.80, and a zoom of 1.0 All images were captured in a stepwise fashion over a defined z-focus range  
1840 corresponding to all visible staining within the section and consistent with the optimum step size for the corresponding objective and the wavelength. Two-  
1842 dimensional images presented here are maximal intensity projections of three-dimensional volumes along the optical axis. Illustrations were prepared using Adobe  
1844 Photoshop (Adobe Systems, San Jose, CA).

#### 1846 **CELL COUNTING**

1848 Analysis was undertaken by counting the numbers of single-labeled, dual-labeled (NOS1 staining colocalizing with p-NOS1). The number of the above Nos1- expressing neuronal populations were counted in the region of organum vasculosum lamina terminalis (OVLT),  
1850 represented by plate 16, of the L.W. Swanson brain map(108) as described previously(15). All the above values for each mouse were used to determine mean counts for each age  
1852 group which were then used to generate mean + SEM values for each group. Embryonic

tissue sagittal sections of the brain were examined in a Zeiss Axio Imager Z2 microscope.

1854 Alexa 488 was imaged by using a 495 beam splitter with an excitation wavelength set at  
450/490 and an emission wavelength set a 500/550, allowing the identification of  
1856 immunocytochemically labeled GnRH neurons. All GnRH neuronal nuclei throughout each  
tissue section were visualized and counted.

1858

#### **ISOLATION OF HYPOTHALAMIC GnRH NEURONS USING FLUORESCENT-ACTIVATED 1860 CELL SORTING**

To obtain single-cell suspensions the preoptic region of *Nos1<sup>-/-</sup>; Gnrh::Gfp*; mice was  
1862 microdissected and enzymatically dissociated using a Papain Dissociation System  
(Worthington, Lakewood, NJ). FACS was performed using an EPICS ALTRA Cell Sorter  
1864 Cytometer device (BD Bioscience). The sort decision was based on measurements of  
GFP fluorescence (excitation: 488nm, 50 mW; detection: GFP bandpass 530/30 nm,  
1866 autofluorescence bandpass 695/40nm) by comparing cell suspensions from *Gnrh::Gfp*  
and wild-type animals. For each animal, approximately 200 GFP-positive cells were sorted  
1868 directly into 10µl extraction buffer: 0.1% Triton® X-100 (Sigma-Aldrich) and 0.4 U/µl  
RNaseOUT™ (Life Technologies).

1870

#### **QUANTITATIVE RT-PCR ANALYSES**

1872 mRNAs obtained from FACS-sorted GnRH neurons or pituitary tissues were reverse  
transcribed using SuperScript® III Reverse Transcriptase (Life Technologies) and a linear  
1874 preamplification step was performed using the TaqMan® PreAmp Master Mix Kit protocol  
(P/N 4366128, Applied Biosystems). Real-time PCR was carried out on Applied  
1876 Biosystems 7900HT Fast Real-Time PCR System using exon-boundary-specific  
TaqMan® Gene Expression Assays (Applied Biosystems): *Gnrh1* (Gnrh1-  
1878 Mm01315605\_m1), *Gnrhr* (Mm00439143\_m1), *Cebpb* (Mm00843434\_s1). Control  
housekeeping genes: *r18S* (18S-Hs99999901\_s1), *ACTB* (Actb-Mm00607939\_s1).

1880

## BRAIN SLICE PREPARATION AND ELECTROPHYSIOLOGY

1882 Infantile *Nos1<sup>+/-</sup>;Gnrh::*Gfp** and *Nos1<sup>-/-</sup>; Gnrh::*Gfp** littermates (P13-P20) were  
anaesthetized with isoflurane, and, after decapitation, the brain was rapidly removed and  
1884 put in ice-cold oxygenated (O<sub>2</sub> 95% / CO<sub>2</sub> 5%) artificial cerebrospinal fluid (ACSF)  
containing the following (in mM): 120 NaCl, 3.2 KCl, 1 NaH<sub>2</sub>PO<sub>4</sub>, 26 NaHCO<sub>3</sub>, 1 MgCl<sub>2</sub>, 2  
1886 CaCl<sub>2</sub>, 10 glucose, pH 7.4 (with O<sub>2</sub> 95% / CO<sub>2</sub> 5%). After removal of the cerebellum, the  
brain was glued and coronal slices (150 μm thickness) were cut throughout the septum  
1888 and preoptic area using a vibratome (VT1200S; Leica). Before recording, slices were  
incubated at 34°C to recover for 1 h. After recovery, slices were placed in a submerged  
1890 recording chamber (32.8°C; Warner Instruments) and continuously perfused (2 ml/min)  
with oxygenated ACSF. *GFP*-positive GnRH neurons in the hypothalamic preoptic area  
1892 were visually identified with a 40 X objective magnification in an upright Leica DM LFSA  
microscope under a FITC filter and their cell body observed by using IR-differential  
1894 interference contrast. Whole-cell patch-clamp recordings were performed in current-clamp  
with bridge mode by using a Multiclamp 700B amplifier (Molecular Devices). Data were  
1896 filtered at 1 kHz and sampled at 5 kHz with Digidata 1440A interface and pClamp 10  
software (Molecular Devices). Pipettes (from borosilicate capillaries; World Precision  
1898 Instruments) had resistance of 6-8 MΩ when filled with an internal solution containing the  
following (in mM): 140 K-gluconate, 10 KCl, 1 EGTA, 2 Mg-ATP and 10 HEPES, pH 7.3  
1900 with KOH. Bridge balance was adjusted to compensate for pipette resistance. All  
recordings were analyzed with Clampfit 10 (Molecular Devices). Junction potentials were  
1902 determined to allow correction of membrane potential values. Electrical membrane  
properties were measured in current-clamp mode by applying a series of current pulses  
1904 from - 60 to + 80 pA (1 s, 10 pA increments). Input resistance (R<sub>in</sub>) was determined by  
measuring the slope of the linear portion of the current-voltage (I-V) curve. All data are  
1906 presented as mean ± standard deviation.

## 1908 STATISTICAL ANALYSIS

All analyses were performed using Graphpad Prism Software (San Diego, CA, RRID:SCR\_002798) and assessed for normality (D'Agostino&Pearson or Shapiro–Wilk test) and variance, when appropriate. Sample sizes were chosen according to standard practice in the field. The investigators were blinded to the group allocation during the experiments. For animal studies, data following the normal distribution were compared using an unpaired two-tailed Student's *t*-test or a one-way ANOVA for multiple comparisons against the control condition followed by Dunnett multiple comparison *post-hoc* test. Data not following normal distribution were analyzed using either a Mann-Whitney *U* test (comparison between two experimental groups) or Kruskal-Wallis test (comparison between three or more experimental groups) followed by a Dunn's *post hoc* analysis. The number of biologically independent experiments, sample size, *P* values, age and sex of the animals are all indicated in the main text or figure legends as well as in the statistical excel file (see data file S1) provided. All experimental data are indicated as mean ± s.e.m. The significance level was set at  $P < 0.05$  with 95% confidence interval. Symbols in figures correspond to the following significance levels: ns.  $P > 0.05$ , \*  $P < 0.05$ , \*\*  $P < 0.001$ , \*\*\* $P < 0.0001$ . Exact *P* values and further statistical analysis provided in the Table S2 and raw data in Table S3.

1926

1928



## Supplementary Tables

1930

| NOS1 mutations           | MAF in gnomAD exome datasets |                   |                          | Allelic count |              |                       | Regional constraint | Protein prediction |     |       |
|--------------------------|------------------------------|-------------------|--------------------------|---------------|--------------|-----------------------|---------------------|--------------------|-----|-------|
|                          | gnomAD                       | gnomAD (controls) | gnomAD (controls) MaxPop | CHH M / W     | gnomAD M / W | Fisher test (p value) | LIMBR (percentile)  | CADD               | PP2 | SIFT2 |
| c.691G>A [p.Ala231Thr]   | absent                       | absent            | absent                   | 1 / 681       | 0 / 108486   | 0.0062                | 4.35%               | 15.01              | B   | T     |
| c.779G>A [p.Arg260Gln]   | 0.003%                       | 0.002%            | 0.006% (Latino)          | 1 / 681       | 2 / 108058   | 0.0187                | 4.35%               | 23.6               | B   | T     |
| c.3320C>T [p.Thr1107Met] | 0.007%                       | 0.006%            | 0.012% (Eu non Finn)     | 1 / 681       | 7 / 108615   | 0.0488                | 1.28%               | 29.9               | D   | D     |
| c.3370G>A [p.Glu1124Lys] | 0.005%                       | 0.006%            | 0.014% (Eu non Finn)     | 2 / 680       | 6 / 108250   | 0.0011                | 1.28%               | 22.3               | B   | T     |
| c.3669A>G [p.Ile1223Met] | absent                       | absent            | absent                   | 1 / 681       | 0 / 108627   | 0.0062                | 1.28%               | 24                 | P   | T     |

Nucleotide and protein changes are based on reference cDNA sequence NM\_000620.4. CHH cohort included 341 patients. MAF, minor allele frequency. M/W, number of mutated/ wild type alleles.

1932

**Table S1: Genetic and functional characterization of NOS1 rare sequence variants in CHH patients**

1934

| Primer name    | Sequence (5' – 3')                                     |
|----------------|--------------------------------------------------------|
| His-NOS1-F     | GTCCAGTGTGGTGAATTCGCC                                  |
| His-NOS1-P2A-R | TCTCCTGCTTGCTTTAACAGAGAGAAGTTCGTGCGGAGCTGAAAACCTCATCGG |
| myc-NOS1-F1    | CGCTTCACGCGGCCGCTATGGAGCAGAACTCATCTCTGAAG              |
| myc-NOS1-F2    | CGCTTCACGCGGCCGCTATGGAGCAAAAACCTTATTTTCAGAGG           |
| myc-NOS1-R1    | GACACCGATGAGGTTTTTCAGCTCCTCTAGACGATTCAGG               |

1936

**Table S4: Primers used for the production of his-NOS1-P2A-myc-NOS1 expression vectors**

1938

1940

1942

1944

## Supplementary Figures

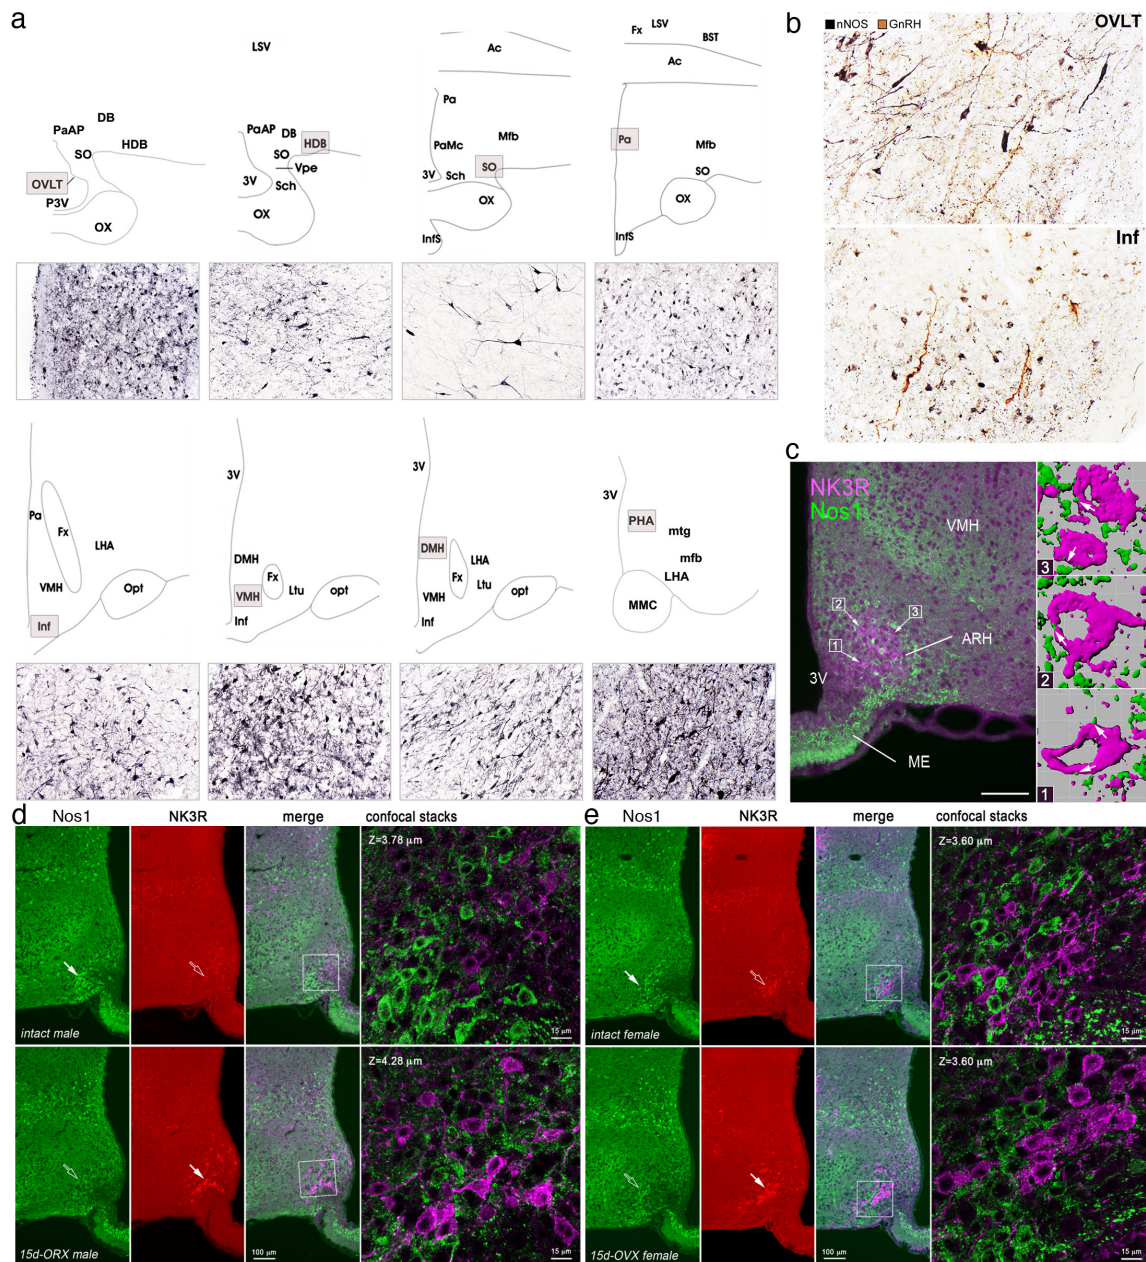

1946

**Figure S1. NOS1 expression in the GnRH neuronal system in humans and mice**

1948

(a) Distribution of NOS1-immunoreactive neurons (purple labeling) throughout the adult hypothalamus in human.

1950

(b) Anatomical relationship between NOS1 neurons (purple) and GnRH neurons (light brown) in the region of the organum vasculosum laminae terminalis (OVLT, upper panel) and the infundibulum (Inf, lower panel) in adult human hypothalamus.

1952

(c) Localization of Nos1 immunoreactivity with respect to the NK3R-immunoreactive kisspeptin neurons in the arcuate nucleus (ARH) of the hypothalamus in mice. Separate neurons display labeling for Nos1 (green) and NK3R (magenta), but their interaction is

1954

1956 visible under the form of putative Nos1-contacts onto NK3R-somatodendritic domains  
1958 (arrows in insets numbered 1-3). *Left*, video camera image of a 12  $\mu\text{m}$ -thick section. *Right*,  
1960 surface renderings of confocal optical sections, 1 $\mu\text{m}$ -thick over a 10 $\mu\text{m}$ -grid. (d,e) Nos1  
1962 and NK3R immunoreactivities in intact and 2-week gonadectomized adult males (d) and  
1964 females (e).  
1966 Ac, anterior commissure; BST, bed of the stria terminalis; DB, diagonal band of Broca;  
1968 DMH, dorsomedial hypothalamic nucleus; fx, fornix; HDB, horizontal limb of the diagonal  
1970 band; LHA, lateral hypothalamic area; LSV, lateral septal nucleus mfb, medial forebrain  
bundle; LTu, lateral tuberal nucleus; MMC, medial mammillary nucleus; mtg, mammillo-  
tegmental tract; opt, optic tract; ox, optic chiasma; Pa, paraventricular nucleus; PaAP,  
paraventricular nucleus anterior parvicellular; PaMC, paraventricular nucleus  
magnocellular part; PHA, posterior hypothalamic area; Sch, suprachiasmatic nucleus; SO,  
supraoptic nucleus; VMH, ventromedial hypothalamic nucleus; 3V, third ventricle. Bar, 100  
 $\mu\text{m}$  in (a) and (c), and 50  $\mu\text{m}$  in (b).

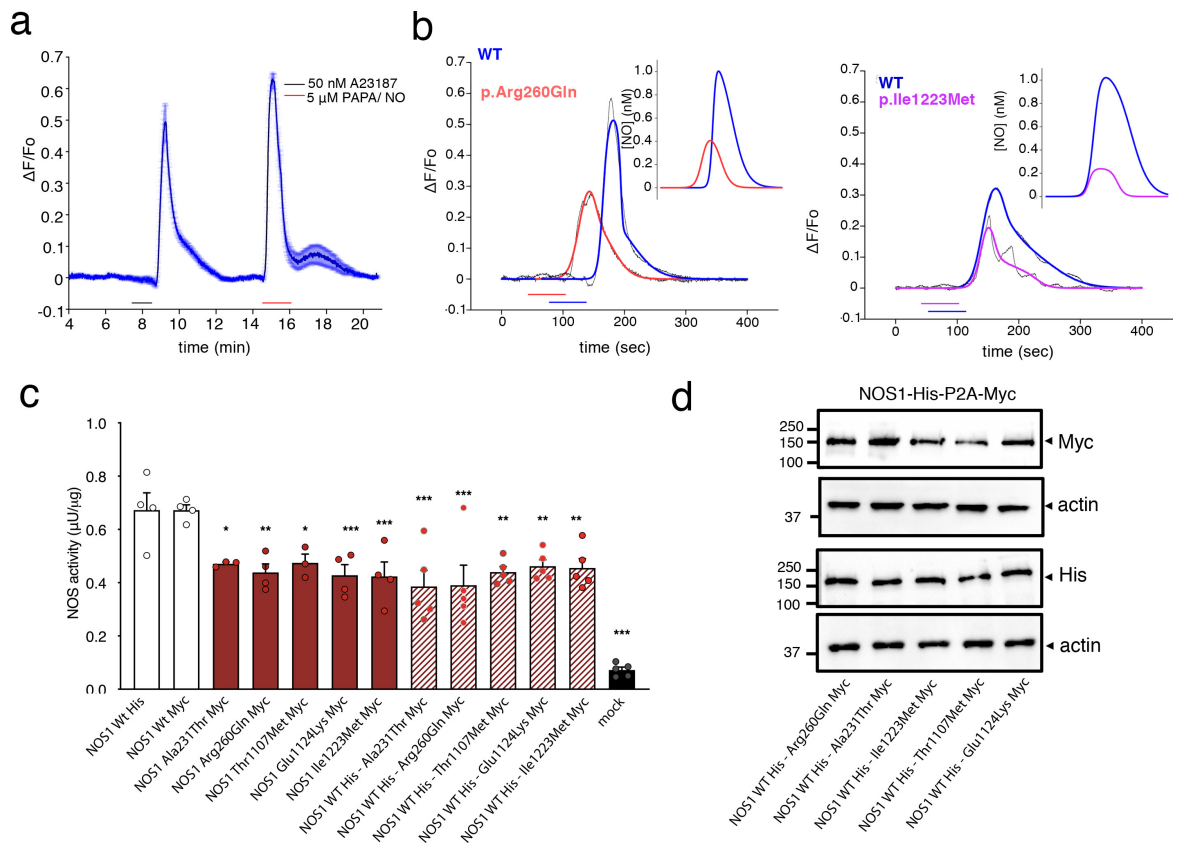

1972

**Figure S2. Functional assays of the NOS1 mutants *in vitro*.**

1974 (a) Demonstration of the experimental protocol routinely used for testing the different  
 1976 NOS1 variants: Superfusion of the calcium ionophore A23187 (50 nM) elicited a seemingly  
 1978 rapid fluorescence response that reached a peak within the first minute of the application  
 1980 in cells expressing the wild-type plasmid before recovering to baseline values on washout.  
 1982 Superfusion of a high concentration of the NO donor PAPA/NO (5  $\mu$ M) allowed us to  
 estimate the peak of the A23187-evoked increase in fluorescence using the published  
 concentration-response curve parameters in FlincG3-transfected HEKGC/PDE5 cells.  
 Data are means of different cells recorded from the same coverslip ( $n > 20$  for each  
 experiment).

1984 (b) Representative illustrations of the behavior of FlincG3-transfected HEKGC/PDE5 cells  
 1986 co-transfected with the wild-type or mutated NOS1 in response to application of the  
 1988 A23187. Mutants are illustrated in comparison to wild-type cells from the same experiment  
 1990 (transfection and imaging). The color-coded line (wild-type NOS1 is represented in blue  
 and mutants are each in a different color) fits the data to the GC/PDE5 model previously  
 published. The inset illustrates the attempts to describe NO generation using the Mathcad  
 model, which are in good agreement with those calculated using the Hill equation (data  
 not shown). The similarities in the shapes of the derived NO concentration profiles indicate

1992 that the time-courses for the mutants are similar to wild-type, suggesting reduced net NO  
1994 synthesis as opposed to altered activation kinetics. Note that NO release was not  
observed in cells not containing any NOS1 construct, while it was abolished in the  
presence of the guanylate cyclase inhibitor ODQ (1  $\mu$ M) (data not shown).

1996 (c) Measurement of the enzymatic activity ( $\mu$ U/ $\mu$ g) of the NOS1 protein detected in HEK  
GC/PDE5 cells expressing the wild-type, or the mutated (identified variants or the  
bicistronic plasmids) NOS1 protein, or in cells not transfected (i.e. mock cells) using a  
1998 commercially available kit. Mutants are compared to wild-type values (one-way ANOVA  
with Dunnett's post-hoc test, n=4,4,3,4,3,4,4,5,5,5,5,5,5). \* P < 0.05; \*\* P < 0.01; \*\*\* P <  
2000 0.001. Values indicate means  $\pm$  SEM. N >3 independent experiments using technical  
replicates; each dot represents an independent experiment including technical triplicates.  
2002 (d) Representative Western blots showing Myc-tagged NOS1 mutants with His-tagged WT  
NOS1 in cells transfected with the bicistronic NOS1-His-PA-NOS1-Myc plasmid. Actin  
2004 immunoblot was used as loading control.

2006

2008



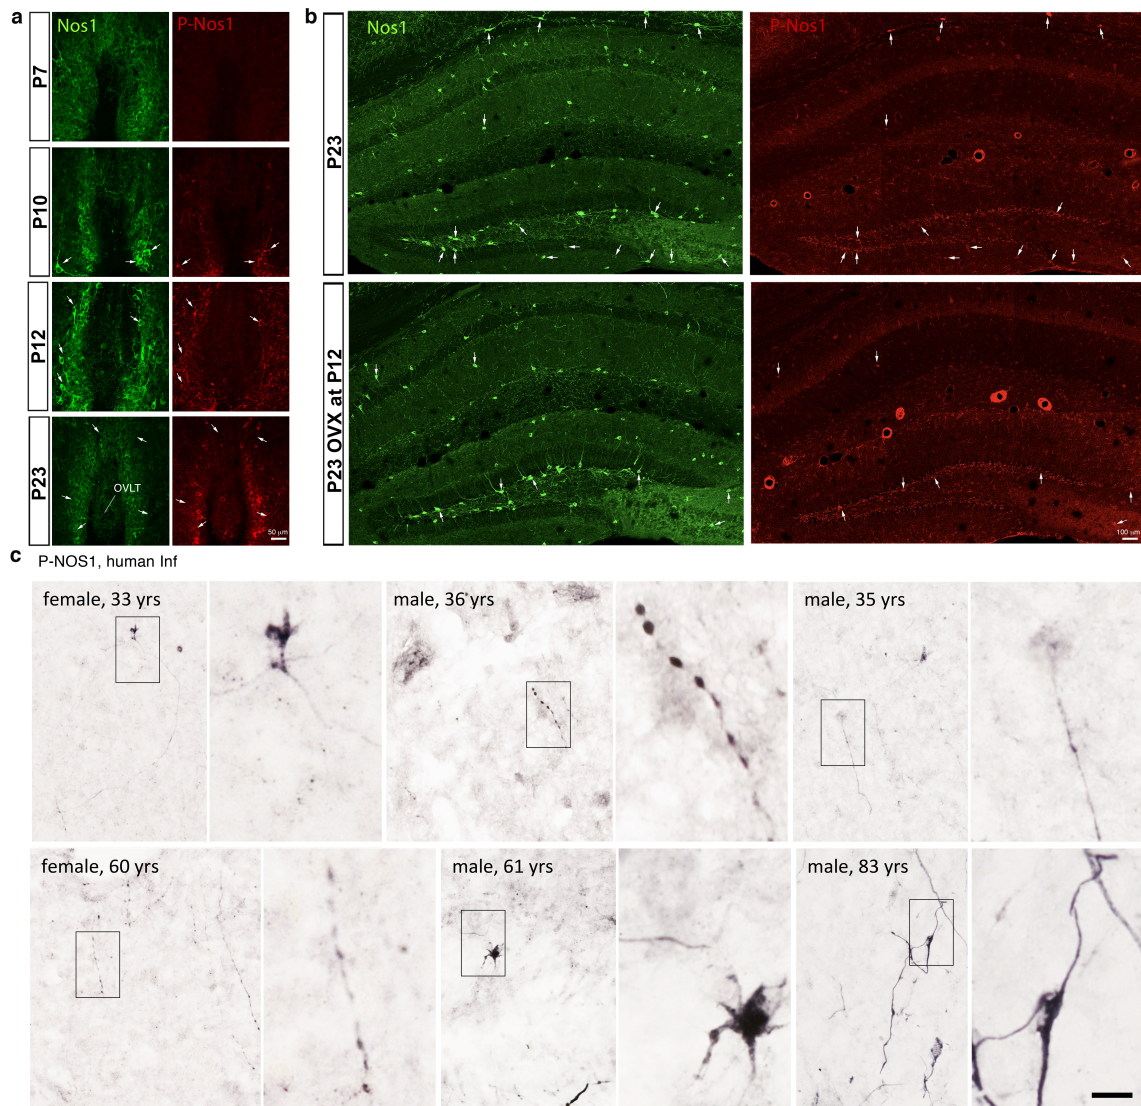

2010 **Figure S3. Immunofluorescent images of the Nos1 / P-Nos1 labeling in various areas**  
 2012 **of the mouse and human brain.**

2014 (a) Progressive phosphorylation of the Nos1 protein during postnatal development in  
 2016 the preoptic region at the level of the organum vasculosum of the lamina terminalis (OVLT)  
 leads to activation of the NO pathway at postnatal day 12. Nos1 (green) and P-Nos1 (red)  
 immunoreactivity in forebrain coronal sections of the OVLT in female mice during pre-  
 pubertal postnatal day 7, 10, 12, and 23.

2018 (b) Ovariectomy at p12 blunted the increase in the phosphorylation of Nos1 at P23 in  
 the hippocampus.

2020 (c) Representative images showing NOS1 Ser1412 phosphorylation immunolabeling in  
 the adult hypothalamus of women and men at different ages.

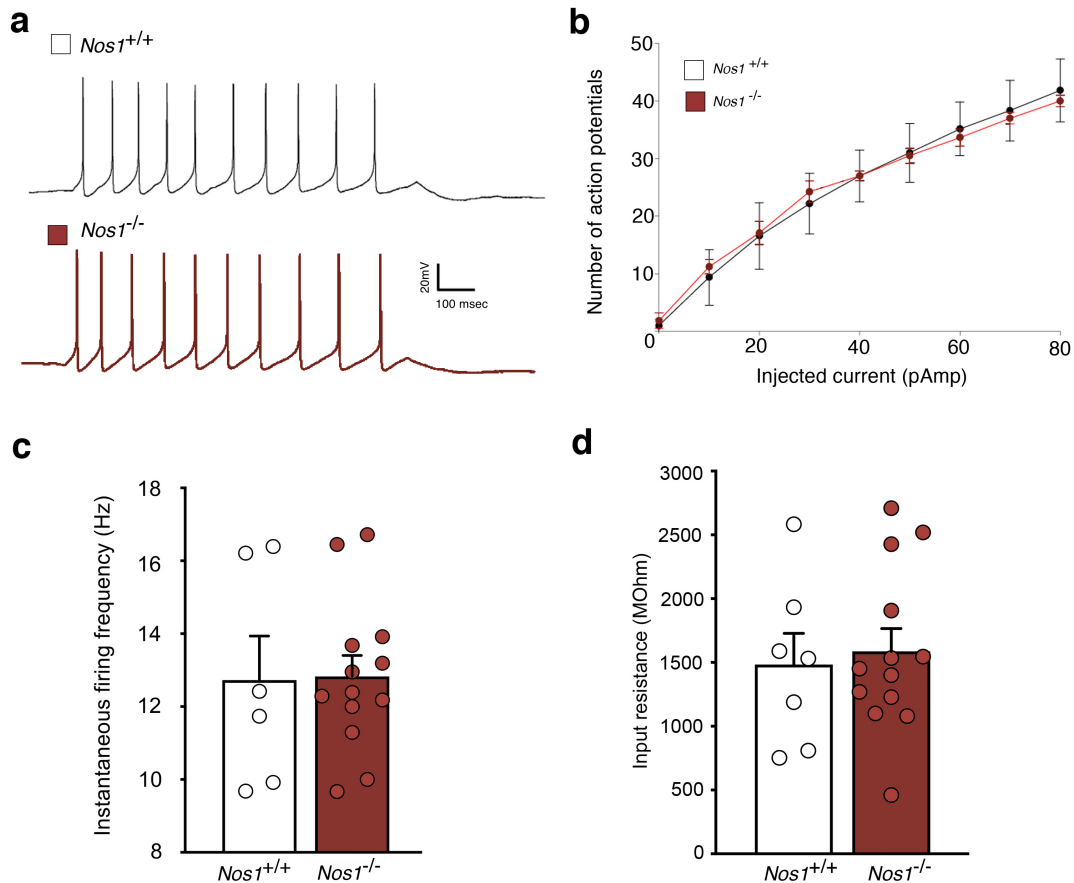

2022

**Figure S4. The increased GnRH excitability in  $Nos1^{-/-}$  mice (Figure 5c, 5d) is not due to cell autonomous changes since the evoked firing response of GnRH neurons does not differ between  $Nos1^{+/+}$  and  $Nos1^{-/-}$  animals.**

2024

(a) Representative traces of firing evoked by a 10pA current injection in GnRH neurons from  $Nos1^{+/+}$  (top trace in black) and  $Nos1^{-/-}$  (bottom trace in brown) mice.

2026

(b) Frequency-Current curve of evoked firing response in GnRH neurons from  $Nos1^{+/+}$  (white) and  $Nos1^{-/-}$  (brown) mice over a range of current injections.

2028

(c) Instantaneous firing frequency (1/1<sup>st</sup> interspike interval) after 10pA current injection in GnRH neurons (n=6,13) from  $Nos1^{+/+}$  and  $Nos1^{-/-}$  animals (N=5,6).

2030

(d) Input resistance in GnRH neurons (n=7,13) from  $Nos1^{+/+}$  and  $Nos1^{-/-}$  animals (N=5,6). Values indicate means  $\pm$  SEM. Animals were from at least 3 independent litters.

2032

2034

2036

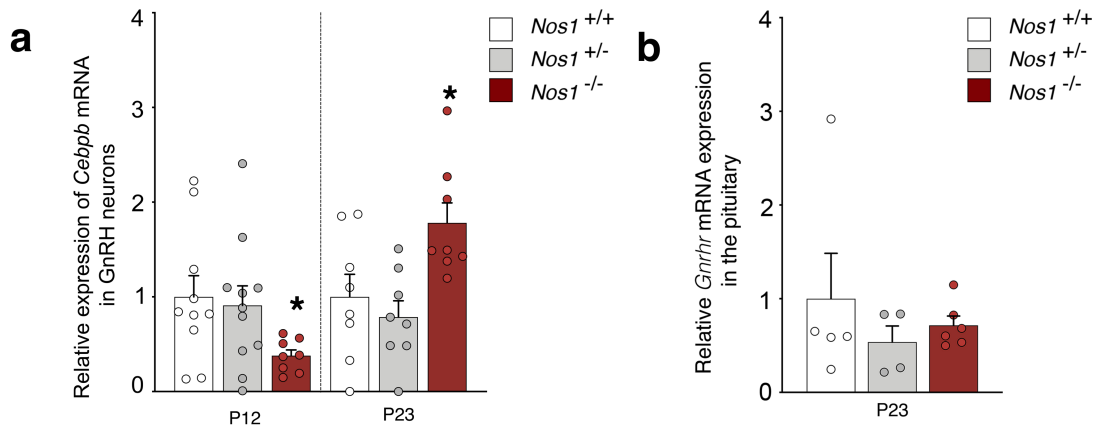

2038 **Figure S5. NOS1-deficiency alters the infantile expression of the *Gnrh* promoter repressor *Cebpb* in GnRH neurons isolated by FACS, but not *Gnrhr* expression in the pituitary.**

2040 (a) *Cebpb* transcript expression in GnRH neurons at P12 and P23 in wild-type and NOS1-deficient mice. *Gnrh::Gfp; Nos1*<sup>+/+</sup> values are compared to those of *Gnrh::Gfp; Nos1*<sup>+/-</sup> and  
2042 *Gnrh::Gfp; Nos1*<sup>-/-</sup> mice (one-way ANOVA with Dunnett's post-hoc test; P12: n=10,11,8; P23: n=8,8,8) \* P<0.05. Values indicate means ± SEM. N=5-8 independent litters.

2044 (b) *Gnrhr* transcript expression in the pituitary at P23 in wild-type and NOS1-deficient mice (n=5,4,6). Values indicate means ± SEM. N>3 independent litters.

2046

2048



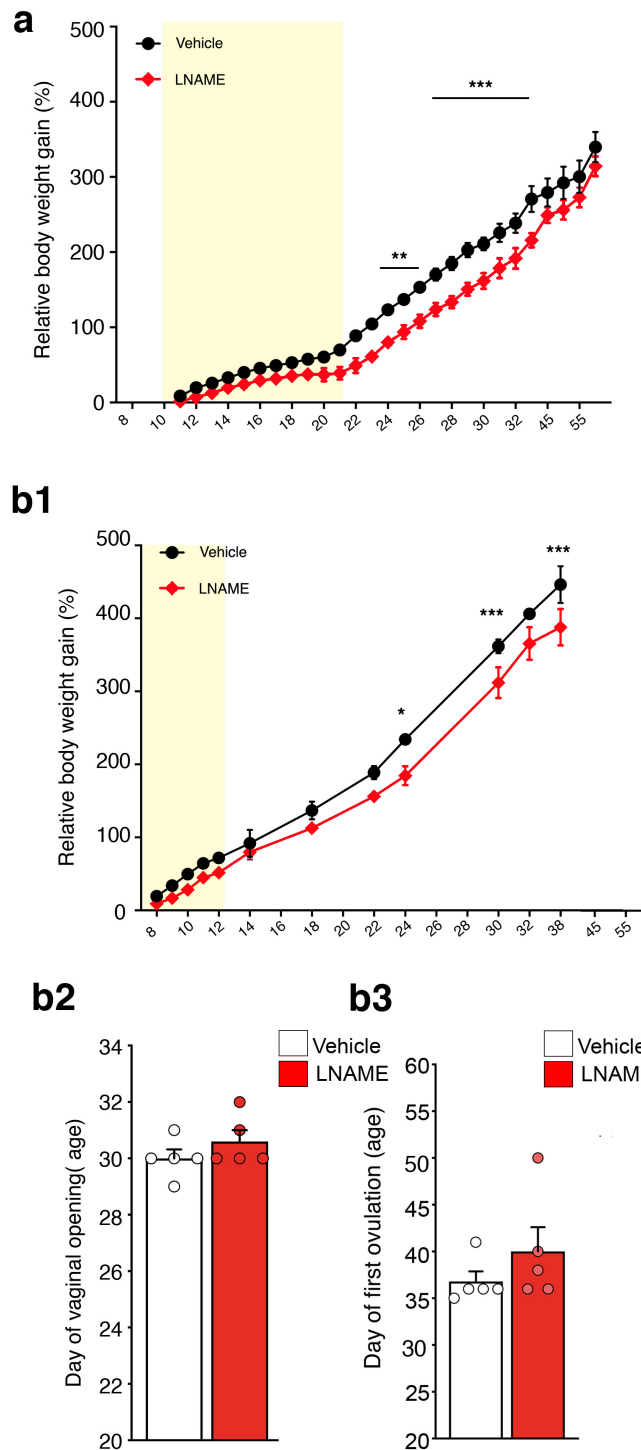

2050 **Figure S6. Pharmacological inhibition of NO synthesis during the beginning of the**  
 2052 **infantile period (P7- 12) leads to a significant decrease in body weight, whilst it has**  
 2054 **no effect on the sexual maturation.** Examination of relative body weight gain (a,b1) of  
 2056 mice treated daily with vehicle or L-NAME between P10 and P23 (a, n=10,9) or P7 and  
 P12 (b1, n=5,6). In the latter group of mice vaginal opening (b2) and pubertal onset in  
 female mice (b3) were also analyzed (n=5,5). Vehicle treated animals are compared with  
 L-NAME injected littermates using multiple t test with Holm-Sidak correction(a) or unpaired

2058 t-test (b,c). \* P < 0.05; \*\* P < 0.01; \*\*\* P<0.001. Values indicate means ± SEM. N>3  
independent litters.

2060

2062

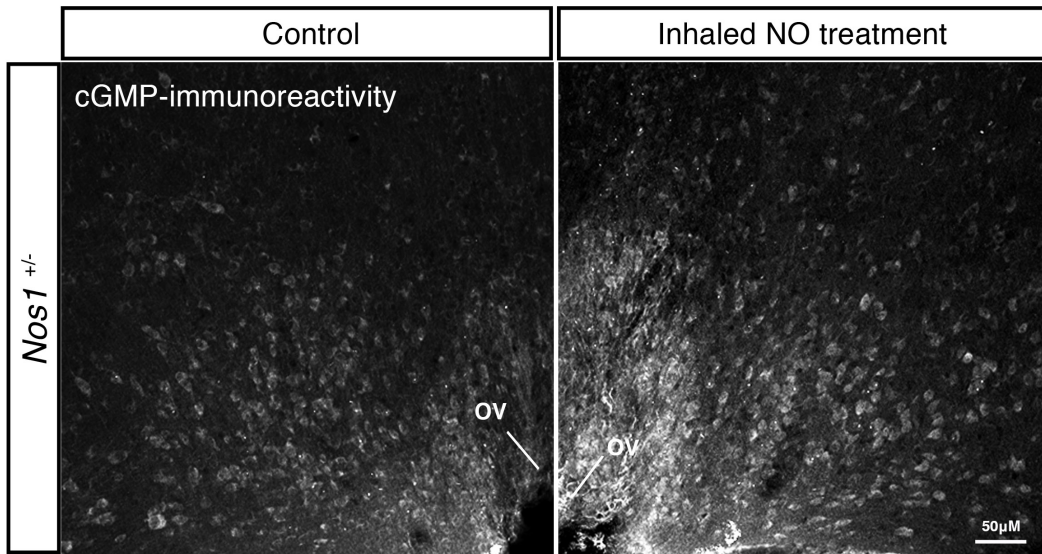

2064 **Figure S7. Representative immunofluorescent image showing increased cGMP**  
2066 **content in the OVLT of P23 *Nos1*<sup>+/-</sup> male mouse after 11-d NO treatment.**  
2068 Immunostaining against cGMP (white) in coronal sections (16µm) from the OVLT region  
2070 of a control (left panel) and inhaled NO treated (right panel) *Nos1*<sup>+/-</sup> male mouse. Pups  
2072 treated with inhaled NO have been exposed with the whole litter to 20 ppm NO from P10  
2074 to P23. Scale bar: 50 µm.

2070

2072

2074
